# Supplementary material for: Hypomorphic ASGR1 modulates lipid homeostasis via INSIG1-mediated SREBP signaling suppression
Source: PubMed Central journal article supplement (PMC8525641; doi:10.1172/jci.insight.147038), 2021-10-08
Supplement: jciinsight-6-147038-s039.pdf [file jciinsight-6-147038-s039.pdf]

Supplemental figures

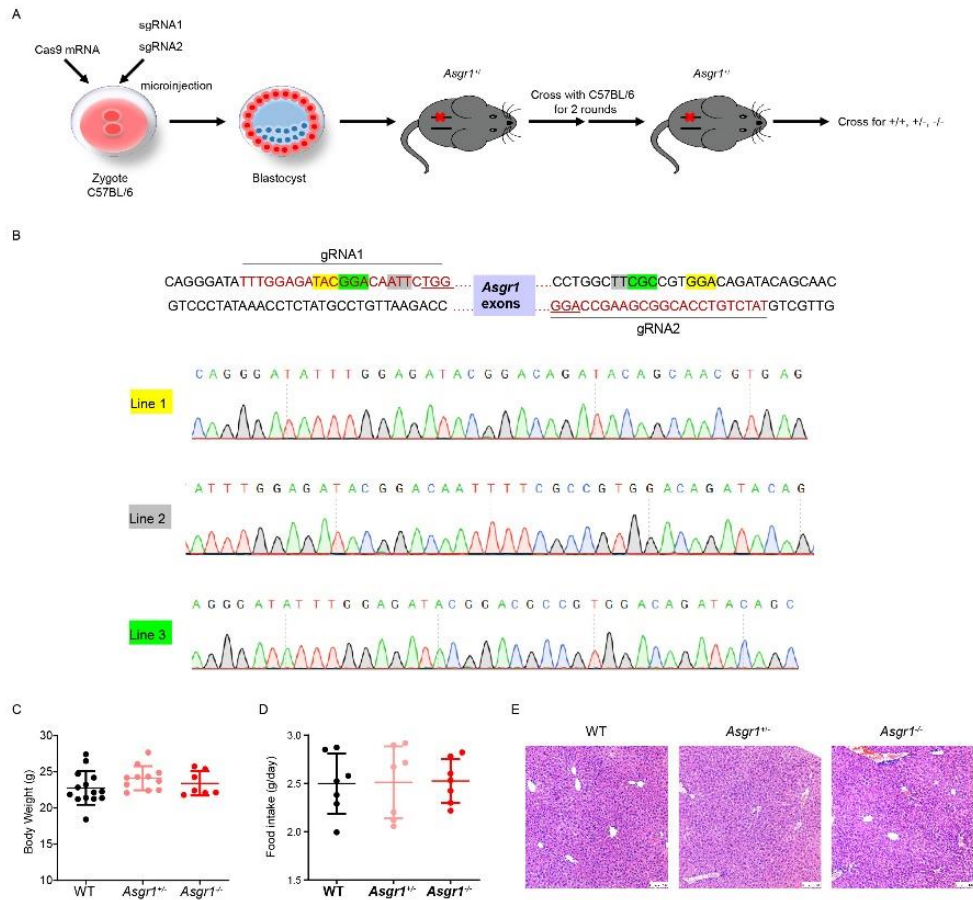

**Figure S1 Generation and characterization of ASGR1-deficient mice models.**

(A) Schematic diagram for generation of *Asgr1* knockout mice using CRISPR/Cas9.

(B) DNA sequencing showing CRISPR-induced deletion of *Asgr1* in genome.

(C) Body weight of WT (n=14), *Asgr1*<sup>+/-</sup> (n=11) and *Asgr1*<sup>-/-</sup> (n=7) male mice.

(D) Food intake of WT, *Asgr1*<sup>+/-</sup> and *Asgr1*<sup>-/-</sup> male mice per day on average, n=7.

(E) Representative H&E staining images of mice liver paraffin sections, scale bars, 100  $\mu$  m.

All data are shown as the means  $\pm$  SD.

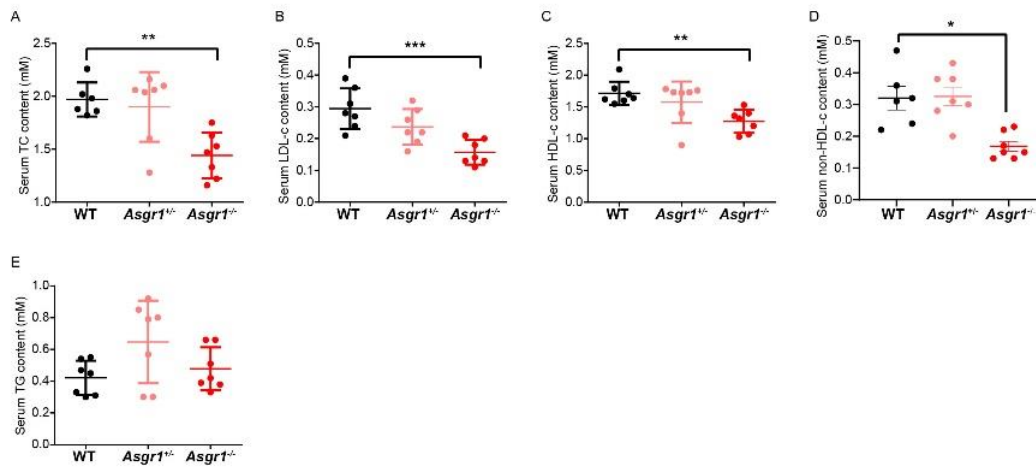

### Figure S2 Characterization of ASGR1-deficient female mice

Female mice at age about 10-13 weeks were fasted overnight.

(A) Total cholesterol (TC), (B) LDL-c, (C) HDL-c, (D) non-HDL-c and (E) TG content in serum of female mice were detected by automatic biochemical analyzer, n=7.

All data are shown as the means  $\pm$  SD. \*p<0.05, \*\*p < 0.01, \*\*\*p < 0.001 as compared to the indicated WT by one-way ANOVA.

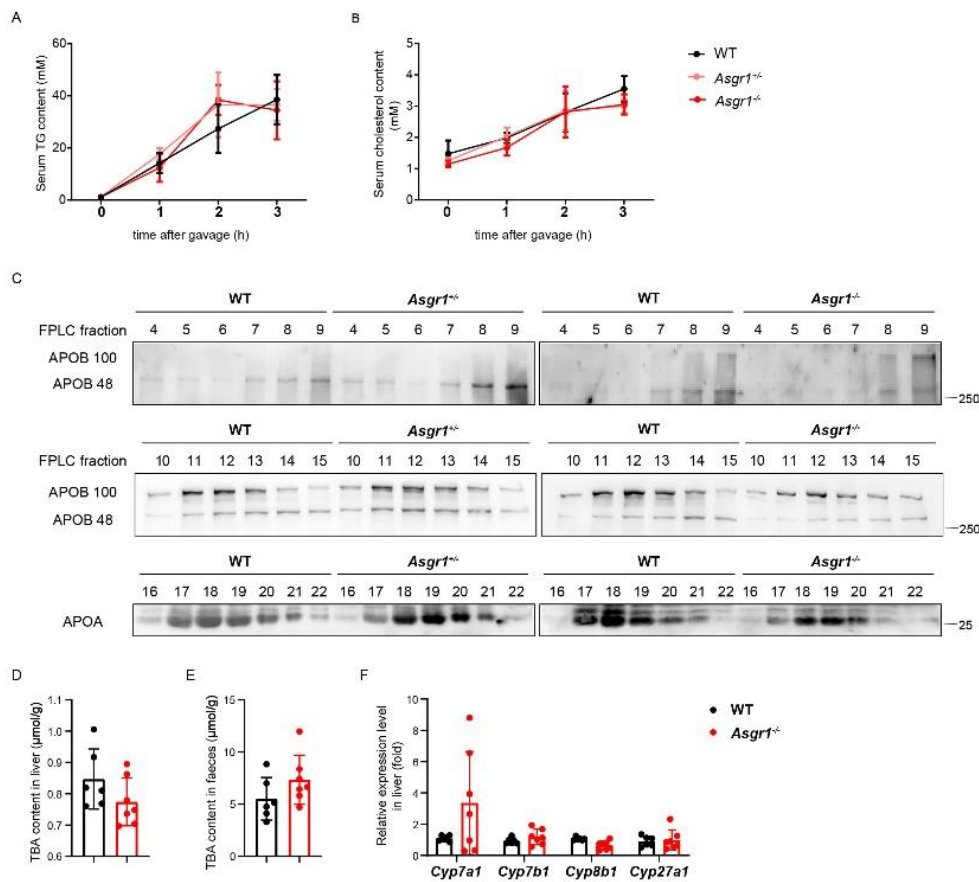

**Figure S3 Metabolic characterization of ASGR1 deficient mice.**

Male mice at age about 10-13 weeks were used for assays.

(A, B) Lipid tolerance assays for WT, *Asgr1*<sup>+/+</sup>, *Asgr1*<sup>-/-</sup> mice. Plasma TG and cholesterol content following i.p. injection with tyloxapol (500mg/kg body weight) after oral olive oil gavage (200  $\mu$ l per mouse) in 5-hr-fasted mice (n=5 per group). (A) TG content of plasma at each time point. (B) Cholesterol content of plasma at each time point.

(C) Western blot of APOB100, APOB48 and APOA in eluted fractions from FPLC fractions containing CM, LDL or HDL particles respectively (n=5 per group).

(D) Total bile acid (TBA) content in mice liver were detected (WT, n=6; *Asgr1*<sup>-/-</sup>, n=7).

(E) TBA content in faces were detected (WT, n=6; *Asgr1*<sup>-/-</sup>, n=7).

(F) Relative mRNA expression level of bile acid synthesis related genes in mice liver (WT, n=6; *Asgr1*<sup>-/-</sup>, n=7).

All data are shown as the means  $\pm$  SD.

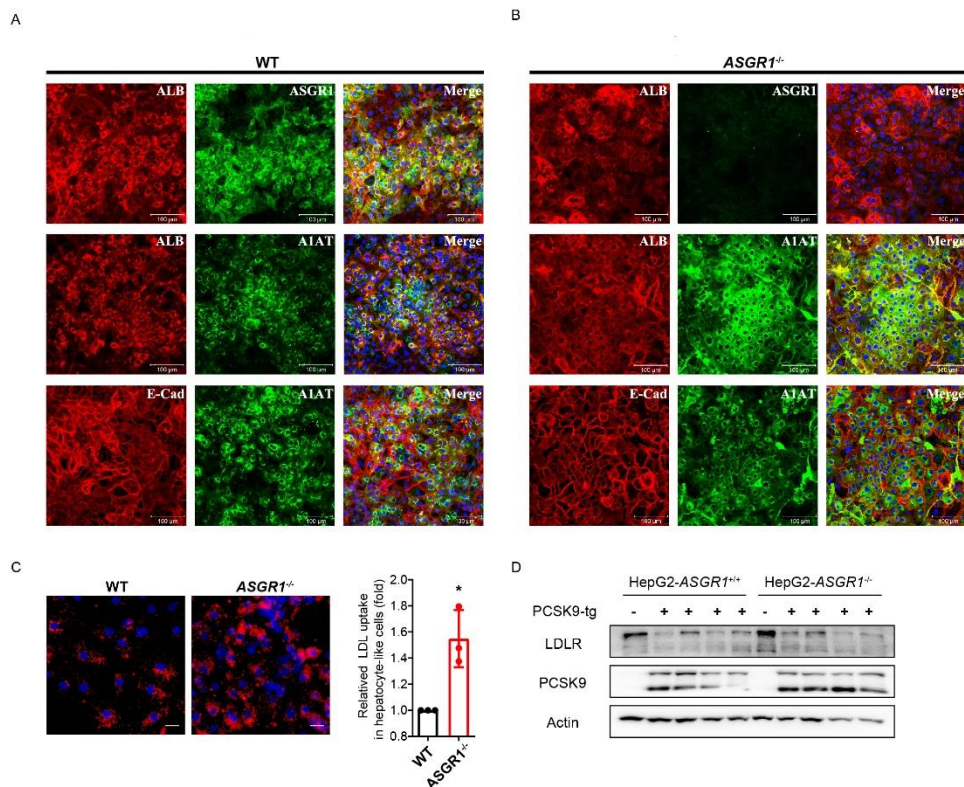

**Figure S4 ASGR1 deficiency increases LDL endocytosis in hepatocyte-like cells.**

Human embryonic stem cells H1 were differentiated to mature hepatocyte-like cells.

(A, B) Immunofluorescence of mature hepatocytes marker proteins, Albumin (ALB), A1AT, E-cadherin (E-cad) and ASGR1 in hepatocyte-like cells derived from H1 and H1-ASGR1<sup>-/-</sup>, n=3. Scale bars, 100µm.

(C) LDL uptake in hepatocyte-like cells. Cells were starved overnight, and incubated with LDL-dil for 3h. Representative images of LDL-dil accumulation in cells were showed, scale bar 20µm. The florescent intensity was shown on the right. Each point represents one of the experimental replicates, n=3.

(D) LDLR protein content changed as PCSK9 protein content changed in HepG2 cells with/without ASGR1, n=3.

All data are shown as the means ± SD. \*p < 0.05 as compared to the indicated WT by Students t test.

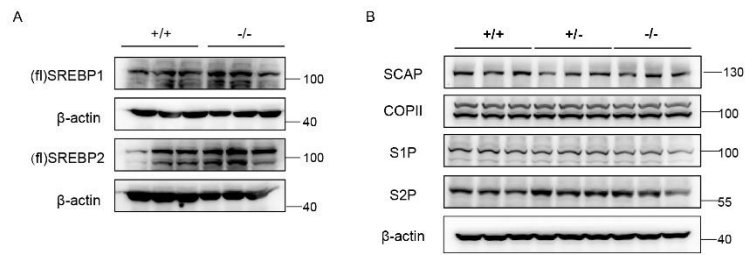

**Figure S5 Expression level of SREBPs and related protein**

(A) Cytoplasm protein of HepG2 cells were separated and detected SREBP1/2 protein by western blotting, n=3.

(B) Western blotting of SCAP, COPII , S1P and S2P in mice liver tissues, n=3.

## Supplemental tables

| REAGENT                                        | SOURCE                          | IDENTIFIER  |
|------------------------------------------------|---------------------------------|-------------|
| <b>Antibody</b>                                |                                 |             |
| Rabbit polyclonal anti-ASGR1                   | Proteintech                     | 11739-1-AP  |
| Rabbit polyclonal anti-MTTP antibody           | Affinity                        | DF6591      |
| Rabbit polyclonal anti-APOB antibody           | Proteintech                     | 20578-1-AP  |
| Rabbit Polyclonal anti-APOA1 antibody          | Proteintech                     | 14427-1-AP  |
| Rabbit polyclonal anti-Anti-PCSK9 [EPR7627(2)] | Abcam                           | ab181142    |
| Rabbit polyclonal anti-LDL Receptor [EP1553Y]  | Abcam                           | ab52818     |
| mouse monoclonal anti-SREBP1 antibody(2A4)     | Thermo Fisher                   | MA5-11685   |
| Rabbit polyclonal anti-SREBP2 antibody         | Abcam                           | ab30682     |
| mouse Monoclonal anti-PDI Antibody             | thermo Fisher                   | MA3-019     |
| Rabbit polyclonal anti-Calnexin antibody       | Enzo                            | ADI-SPA-860 |
| Rabbit polyclonal anti-INSIG1 antibody         | Proteintech                     | 22115-1-AP  |
| Rabbit polyclonal anti-INSIG2 antibody         | Proteintech                     | 24766-1-AP  |
| Rabbit polyclonal anti-SCAP antibody           | Proteintech                     | 12266-1-AP  |
| Rabbit polyclonal anti-S1P antibody            | Abcam                           | ab140592    |
| Rabbit polyclonal anti-S2P antibody            | Abcam                           | ab140594    |
| Rabbit polyclonal anti-COPII antibody          | Thermo Fisher                   | PA1069A     |
| Rabbit polyclonal anti-Tubulin antibody        | Cell Signaling Technology (CST) | 2146        |
| Rabbit monoclonal anti- $\beta$ actin antibody | Cell Signaling Technology (CST) | 4970        |
| Rabbit monoclonal anti-LaminB1(D4Q4Z)          | Cell Signaling Technology (CST) | 12585S      |
| Goat anti-mouse                                | KangCheng Bio                   | KC-MM-      |

|                                                                           |                 |                |
|---------------------------------------------------------------------------|-----------------|----------------|
| IgG(H&L)[HRP]                                                             |                 | 035(1ml)       |
| Goat anti-Rabbit IgG(H&L)[HRP]                                            | KangCheng Bio   | KC-RB-035(1ml) |
| Donkey anti-mouse IgG 488                                                 | Life            | A21202         |
| Donkey anti-mouse IgG 568                                                 | Life            | A10037         |
| Donkey anti-Rabbit IgG 488                                                | Life            | A21206         |
| Donkey anti-Rabbit IgG 568                                                | Life            | A10042         |
| DAPI                                                                      | Sigma           | D9542          |
| <b>Chemicals, Peptides, Recombinant Proteins, metarials and Assay kit</b> |                 |                |
| DMEM                                                                      | Gibco           | 10567-022      |
| Fetal Bovine Serum                                                        | Gibco           | A115-500       |
| NEAA                                                                      | Gibco           | 11140-050      |
| Penicillin-Streptomycin                                                   | Gibco           | 15140122       |
| 0.25% Trypsin-EDTA                                                        | Gibco           | 25200-114      |
| ITS                                                                       | Gibco           | 41400045       |
| Superose™ 6 10/300 GL                                                     | GE              | 17-5172-01     |
| Tissue and cell triglyceride (TG) assay kit                               | APPLYGEN        | E1013          |
| Tissue total cholesterol enzymatic determination                          | APPLYGEN        | E1016          |
| Tyloxapol                                                                 | SIGMA           | T0307-10g      |
| Human APOB ELISA kit                                                      | Abcam           | ab108807       |
| LDL-Dil                                                                   | invitrogen      | I3482          |
| Nuclear protein and cytoplasmic protein extraction kit                    | Beyotime        | P0028          |
| Endoplasmic reticulum extraction kit                                      | BestBio         | BB-3605-2      |
| Trizol                                                                    | MCE             | N/A            |
| SYBR-green                                                                | Bio-RAD         | N/A            |
| Protease Inhibitor Cocktail Tablets                                       | Roche           | 11 873 580 001 |
| PHOS-STOP                                                                 | Roche           | 04 906 837 001 |
| PMSF                                                                      | Beyotime        | ST506          |
| PVDF membrane                                                             | Merck Millipore | IPVH00010      |
| Triton X-100                                                              | MP              | N/A            |
| Tris Base                                                                 | Genestar        | N/A            |
| Agarose                                                                   | Genestar        | VA10252        |
| <b>Cell lines and mice strains</b>                                        |                 |                |
| Human: HepG2                                                              | N/A             |                |
| Human:293T                                                                | N/A             |                |

| Mouse: C57BL/6                             | Beijing Vital River Laboratory Animal Technology |  |
|--------------------------------------------|--------------------------------------------------|--|
| Mouse: C57BL/6 <i>Asgr1</i> <sup>-/-</sup> | Cyagen                                           |  |
| <b>Quantitative RT-PCR primers</b>         |                                                  |  |
| Primer name                                | Sequence                                         |  |
| Human-ARG1-forward                         | GTGGAAACTTGCATGGACAAC                            |  |
| Human-ARG1-reverse                         | AATCCTGGCACATCGGGAATC                            |  |
| Human-ASL-forward                          | CAGTGGACCCCATCATGGAGA                            |  |
| Human-ASL-reverses                         | CAGTGGACCCCATCATGGAGA                            |  |
| Human-CPS1-forward                         | AATGAGGTGGGCTTAAAGCAAG                           |  |
| Human-CPS1-reverse                         | AGTTCCACTCCACAGTTCAGA                            |  |
| Human-CYP2D6-forward                       | CCAACGGTCTCTTGACAAAG                             |  |
| Human-CYP2D6-reverse                       | GGGTCGTCGTACTIONCGAAGC                           |  |
| Human-CYP3A4-forward                       | AAGTCGCCTCGAAGATACACA                            |  |
| Human-CYP3A4-reverse                       | AAGGAGAGAACACTGCTCGTG                            |  |
| Human-CYP2C9-forward                       | GCCTGAAACCCATAGTGGTG                             |  |
| Human-CYP2C9-reverse                       | GGGGCTGCTCAAATCTTGATG                            |  |
| Human-CYP1A2-forward                       | ATGCTCAGCCTCGTGAAGAAC                            |  |
| Human-CYP1A2-reverse                       | GTTAGGCAGGTAGCGAAGGAT                            |  |
| Human-A1AT-forward                         | GGAGGCTCAGATCCATGAAGG                            |  |
| Human-A1AT-reverse                         | GGTGTCCCCGAAGTTGACAG                             |  |
| Human-GAPDH-forward                        | CAAAGTTGTCATGGATGACC                             |  |
| Human-GAPDH-reverse                        | CCATGGAGAAGGCTGGGG                               |  |
| Human-Ki67-forward                         | GCCTGCTCGACCCTACAGA                              |  |
| Human-Ki67-reverse                         | GCTTGTCAACTGCGGTTGC                              |  |
| Human-CK19-forward                         | GAACCATGAGGAGGAAATCAG                            |  |
| Human-CK19-reverse                         | CATGTCACTCAGGATCTTGG                             |  |
| Human-ALB-forward                          | TGGCACAATGAAGTGGGTAA                             |  |
| Human-ALB-reverse                          | CTGAGCAAAGGCAATCAACA                             |  |
| Human-HNF4 $\alpha$ -forward               | TGTACTIONCTGCAGATTTAGCC                          |  |
| Human-HNF4 $\alpha$ -reverse               | CTGTCCCTCATAGCTTGACCT                            |  |
| Human-AFP-forward                          | AGAACCTGTCAACAAGCTGTG                            |  |
| Human-AFP-reverse                          | GACAGCAAGCTGAGGATGTC                             |  |
| Huamn- $\beta$ actin forward               | CTCCTCCTGAGCGCAAGTACTC                           |  |
| Huamn- $\beta$ actin reverse               | TCCTGCTTGCTGATCCACATC                            |  |
| Huamn-APOB forward                         | ACACACTGGACGCTAAGAGGA                            |  |
| Huamn-APOB reverse                         | ACTTGTGCTACCATCCATACT                            |  |
| Huamn-MTTP forward                         | TTCATGCAAATAGCGAGGTCT                            |  |
| Huamn-MTTP reverse                         | GCTTCGGTTGTCTTCAGCTCTA                           |  |
| Huamn-LDLR forward                         | TCTGCAACATGGCTAGAGACT                            |  |
| Huamn-LDLR reverse                         | TCCAAGCATTCGTTGGTCCC                             |  |
| Huamn-PCSK9 forward                        | CCTGGAGCGGATTACCCCT                              |  |



|                              |                          |  |
|------------------------------|--------------------------|--|
| Huamn-PCSK9 reverse          | CTGTATGCTGGTGTCTAGGAGA   |  |
| Huamn-SREBF1 forward         | GCCCCTGTAACGACCACTG      |  |
| Huamn-SREBF1 reverse         | CAGCGAGTCTGCCTTGATG      |  |
| Huamn-SREBF2 forward         | CCTGGGAGACATCGACGAGAT    |  |
| Huamn-SREBF2 reverse         | TGAATGACCGTTGCACTGAAG    |  |
| Huamn-ACC forward            | ATGTCTGGCTTGCACCTAGTA    |  |
| Huamn-ACC reverse            | CCCCAAAGCGAGTAACAAATTCT  |  |
| Huamn-FASN forward           | CCGAGACACTCGTGGGCTA      |  |
| Huamn-FASN reverse           | CTTCAGCAGGACATTGATGCC    |  |
| Huamn-SCD1 forward           | TTCCTACCTGCAAGTTCTACACC  |  |
| Huamn-SCD1 reverse           | CCGAGCTTTGTAAGAGCGGT     |  |
| Huamn-HMGCS forward          | GATGTGGGAATTGTTGCCCTT    |  |
| Huamn-HMGCS reverse          | ATTGTCTCTGTTCCAACCTCCAG  |  |
| Huamn-HMGCR forward          | TGATTGACCTTTCCAGAGCAAG   |  |
| Huamn-HMGCR reverse          | CTAAAATTGCCATTCCACGAGC   |  |
| Huamn-ASGR1 forward          | GAGAGAGACGTTTCAGCAACTTC  |  |
| Huamn-ASGR1 reverse          | GGGACTCTAGCGACTTCATCTT   |  |
| Mouse- $\beta$ actin forward | GGCTGTATTCCCCTCCATCG     |  |
| Mouse- $\beta$ actin reverse | CCAGTTGGTAACAATGCCATGT   |  |
| Mouse-Apob forward           | GCTCAACTCAGGTTACCGTGA    |  |
| Mouse-Apob reverse           | AGGGTGTACTGGCAAGTTTGG    |  |
| Mouse-Mttp forward           | AATGCGGGTCAACAGAGAGG     |  |
| Mouse-Mttp reverse           | CTGGCTCGTTTTTCATAGGAGTAG |  |
| Mouse-Ldlr forward           | TCAGACGAACAAGGCTGTCC     |  |
| Mouse-Ldlr reverse           | CCATCTAGGCAATCTCGGTCTC   |  |
| Mouse-Pcsk9 forward          | GCCCATCGGGAGATTGAGG      |  |
| Mouse-Pcsk9 reverse          | TTCCCTTGACAGTTGAGCACA    |  |
| Mouse-Srebf1 forward         | GCAGCCACCATCTAGCCTG      |  |
| Mouse-Srebf1 reverse         | CAGCAGTGAGTCTGCCTTGAT    |  |
| Mouse-Srebf2 forward         | CCAAGCTGGGCGATGGAT       |  |
| Mouse-Srebf2 reverse         | TAGCATCTCGTCGATGTCCC     |  |
| Mouse-Acc forward            | CTCCCATTTCATAATTGGGTCTG  |  |
| Mouse-Acc reverse            | TCGACCTTGTTTTACTAGGTGC   |  |
| Mouse-Fasn forward           | GGAGGTGGTGATAGCCGGTAT    |  |
| Mouse-Fasn reverse           | TGGGTAATCCATAGAGCCCAG    |  |
| Mouse-Scd1 forward           | TTCTTGCGATACTCTGGTGC     |  |
| Mouse-Scd1 reverse           | CGGGATTGAATGTTCTTGTCTG   |  |
| Mouse-Hmgcs forward          | TGGCTATAAAGCTGCGGAGG     |  |
| Mouse-Hmgcs reverse          | GGTGAAAGAGCCAAAGGGGA     |  |
| Mouse-Hmgcr forward          | CGGGAGCCCTAGAGAACAAG     |  |
| Mouse-Hmgcr reverse          | CTTGGATCCCACGCGGA        |  |
| <b>Oligonucleotides</b>      |                          |  |

|                                                        |                                              |  |
|--------------------------------------------------------|----------------------------------------------|--|
| Mice <i>Asgr1</i> knock-out<br>sgRNA sequence          | gRNA1:<br>TTTGGAGATACGGACAATTCTGG            |  |
|                                                        | gRNA2:<br>TATCTGTCCACGGCGAAGCCAGG            |  |
| Mice <i>ASGR1</i> knock-out<br>Identification primers  | Forward:<br>TTTGAGAAGCCCTTGTCTTCCAGAG        |  |
|                                                        | Revers:<br>ATGTGTCTGTGATCCTGAGCTGGGTA        |  |
|                                                        | Wt/He-Forward:<br>GGAACAGACTACGAGACAGGCTTCCA |  |
| Human <i>ASGR1</i> knock-out<br>sgRNA sequence         | gRNA-1:<br>GTATCAAGACCTTCAGCATCTGG           |  |
|                                                        | gRNA-2:<br>GACCACCATCAGCTCAGAAAAGG           |  |
| Human <i>ASGR1</i> knock-out<br>Identification primers | Forward:<br>TGATGGAGCCGTCAATCAGATG           |  |
|                                                        | Reverse: ACTGTCGGCTTCCTATGACG                |  |
| INSIG1-siRNA sequence<br>for human                     | Forward:<br>GACUGUGGAUUAUGACAAAdTdT          |  |
|                                                        | Reverse:<br>UUUGUCAUAAUCCACAGUCdTdT          |  |
| Negative control-siRNA<br>sequence for human           | Forward:<br>UUCUCCGAACGUGUCACGUdTdT          |  |
|                                                        | Reverse:<br>ACGUGACACGUUCGGAGAAAdTdT         |  |
| Insig1-siRNA sequence for<br>mouse                     | Forward:<br>CCACGCCAGTGCCAAATTA              |  |
|                                                        | Reverse:<br>TAATTTGGCTCUGGCGUGG              |  |
| Negative control-siRNA<br>sequence for mouse           | Forward: provided by Ribobio                 |  |
|                                                        | Reverse: provided by Ribobio                 |  |
| <b>Bacterial and Virus Strains</b>                     |                                              |  |
| Cas9-G418 plasmid                                      | Gift from Professor Lai Liangxue             |  |
| gRNA plasmid                                           | Gift from Professor Lai Liangxue             |  |
| pRlenti plasmid                                        | Gift from Professor Miguel Angel Esteban     |  |
